# Supplementary material
Source: ML conference proceedings conference paper supplement (https://www.ecva.net/papers/eccv_2024/papers_ECCV/html/7392_ECCV_2024_paper.php)
Supplement: Supplementary file 1 [file 07392-supp.pdf]

# Arbitrary-Scale Video Super-Resolution with Structural and Textural Priors: Supplementary Material

Wei Shang<sup>1,2</sup>, Dongwei Ren<sup>1\*</sup>, Wanying Zhang<sup>1</sup>,  
Yuming Fang<sup>3</sup>, Wangmeng Zuo<sup>1</sup>, and Kede Ma<sup>2</sup>

<sup>1</sup> School of Computer Science and Technology, Harbin Institute of Technology

<sup>2</sup> Department of Computer Science, City University of Hong Kong

<sup>3</sup> Jiangxi University of Finance and Economics

{csweishang, rendongwei@hit, swzwanying}@gmail.com

leo.fangyuming@foxmail.com, wmzuo@hit.edu.cn, kede.ma@cityu.edu.hk

## 1 Data Pre-Processing and Training Pipeline

We visualize the data pre-processing and training pipeline in Fig. [1](#) in which we set  $T = 2$ .

## 2 Visual Comparison of B-AVSR and ST-AVSR

In the main text, we have provided quantitative comparison of B-AVSR and ST-AVSR. In Fig. [2](#) we present qualitative comparison, where we observe that our multi-scale structural and textural prior encourages more faithful detail at various scales to be recovered.

## 3 More Results on the REDS Dataset

We provide more visual results on the REDS dataset in Figs. [3](#) and [4](#).

## 4 More Results on the Vid4 Dataset

We provide more visual results on the Vid4 dataset in Fig. [5](#).

---

\* Corresponding author.

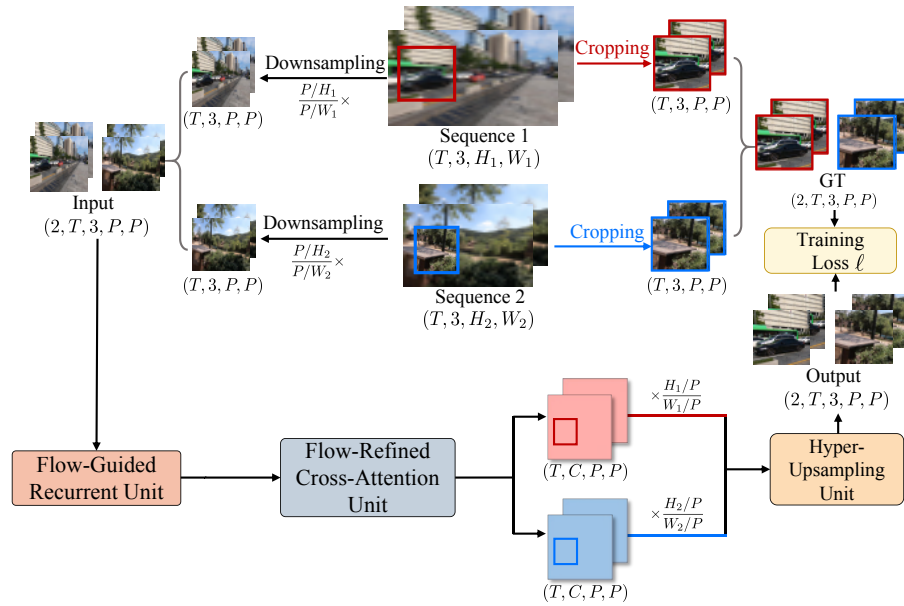

**Fig. 1:** Data pre-processing and training pipeline for B-AVSR and ST-AVSR.

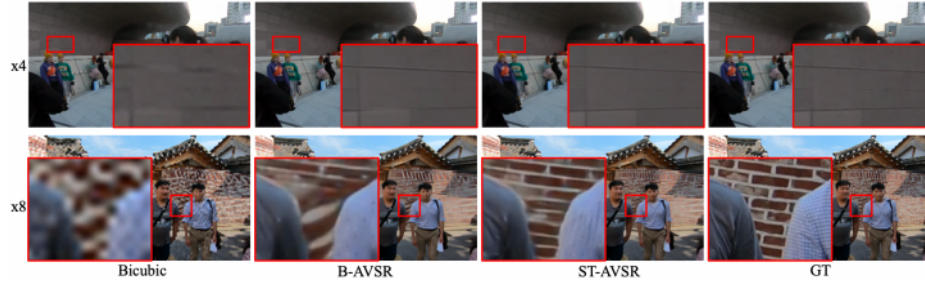

**Fig. 2:** Effectiveness of our multi-scale structural and textural prior in aiding AVSR.

## References

1. Liu, C., Sun, D.: On bayesian adaptive video super resolution. *IEEE TPAMI* **36**(2), 346–360 (2013)
2. Nah, S., Baik, S., Hong, S., Moon, G., Son, S., Timofte, R., Mu Lee, K.: NTIRE 2019 challenge on video deblurring and super-resolution: Dataset and study. In: *CVPRW*. pp. 0–0 (2019)

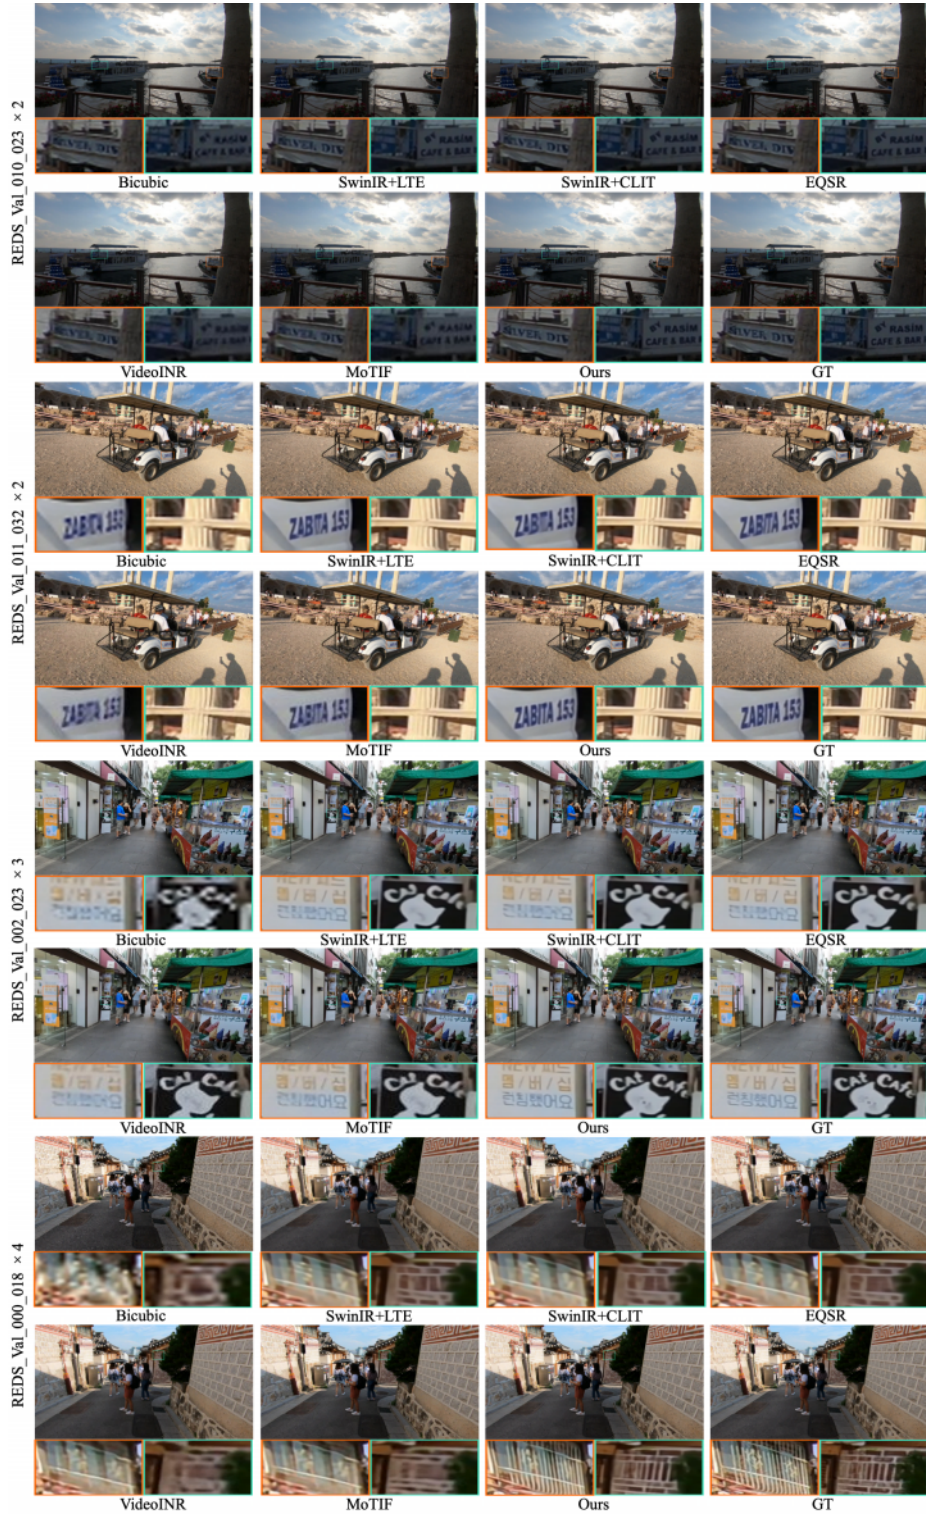

Fig. 3: More visual results on the REDS dataset [2].

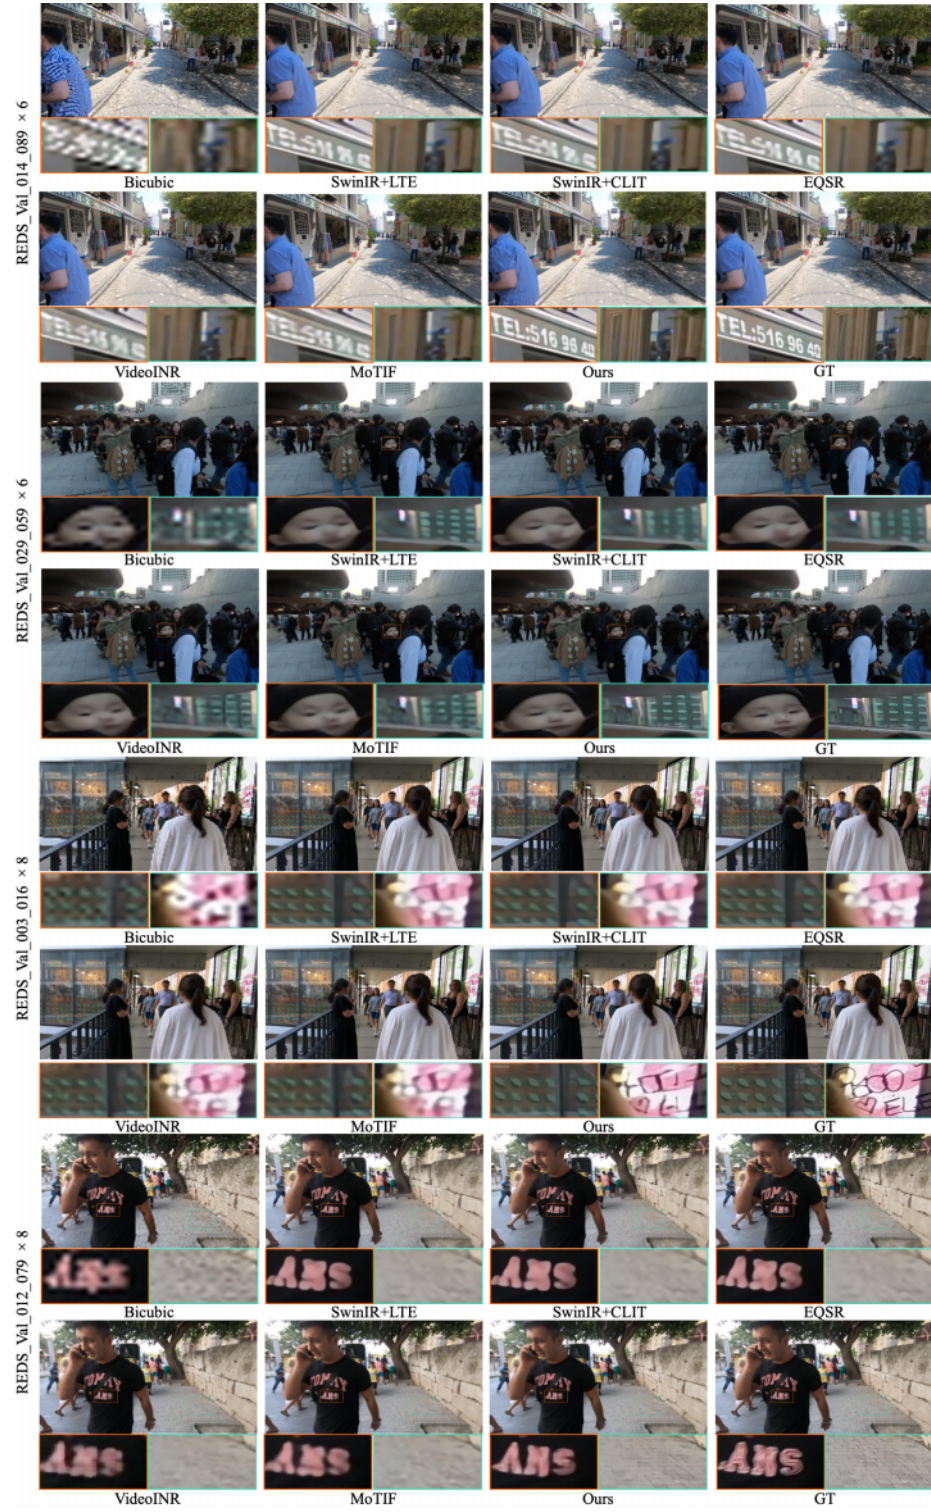

Fig. 4: More visual results on the REDS dataset [2].

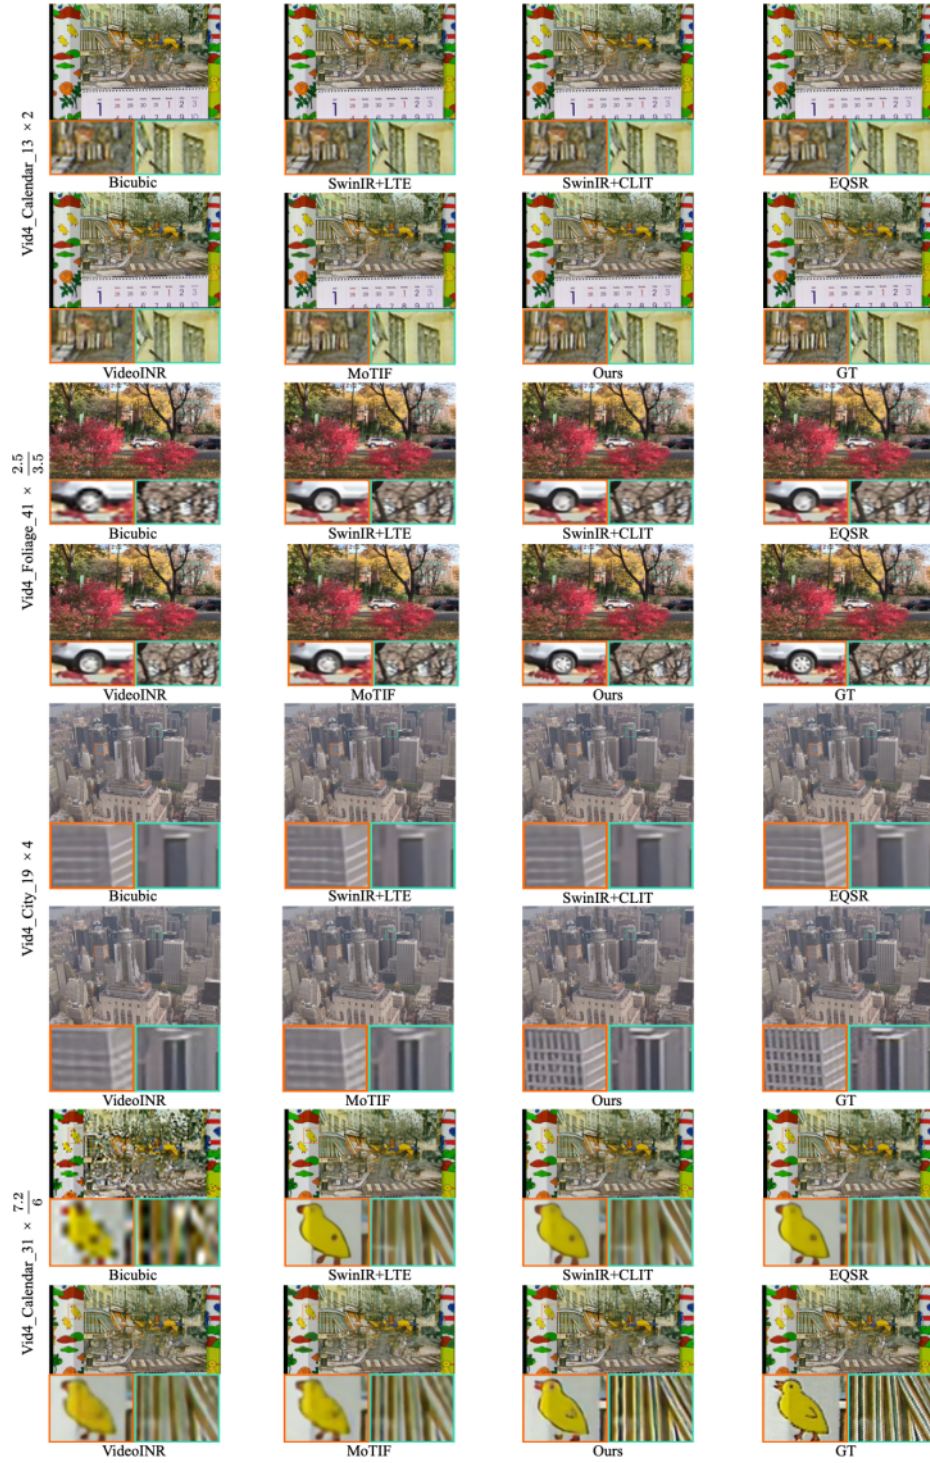

Fig. 5: More visual results on the Vid4 dataset [1].
